# Supplementary material for: Chondroitin sulfate proteoglycan 4 expression in chondrosarcoma: A potential target for antibody-based immunotherapy
Source: PubMed Central journal article supplement (PMC9468862; doi:10.3389/fonc.2022.939166), 2022-08-30

10 Gy radiation increases the expression of CSPG4 on chondrosarcoma cell lines (CS1 and SW1353)

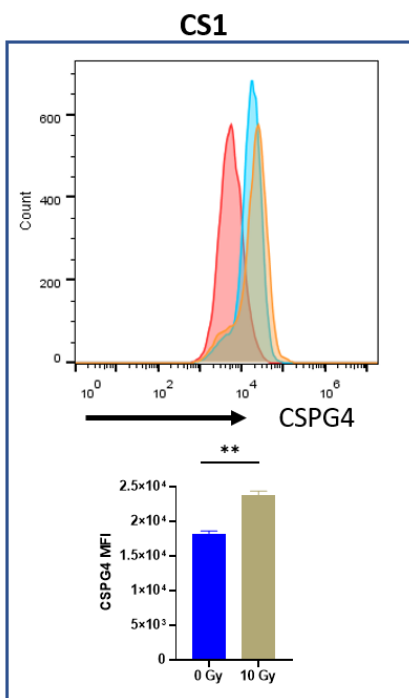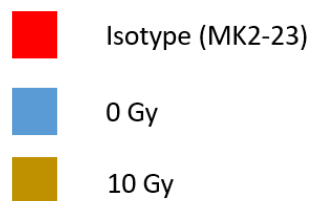

**Day 0:** Seed tumor cells at  $5 \times 10^5$  per well into 6 well plate  
**Day 1:** 10 Gy radiation  
**Day 2:** check CSPG4 expression via flow cytometry

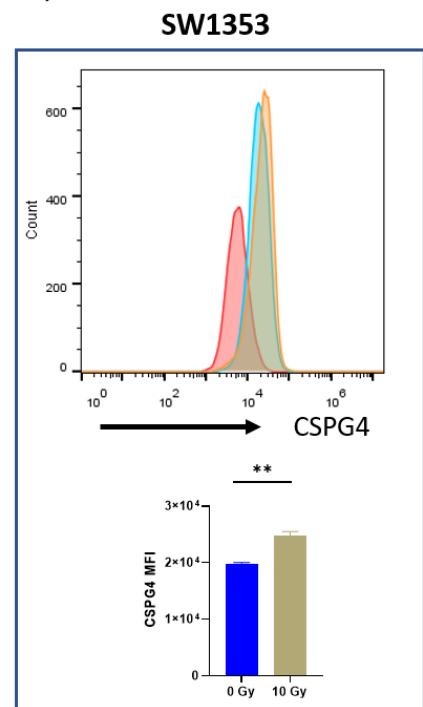

Supplement: DataSheet_1.pdf [file DataSheet_1.pdf]
